# Supplementary material for: Aptamer-Based Molecular Recognition of Lysergamine, Metergoline and Small Ergot Alkaloids
Source: Int J Mol Sci. 2012 Dec 14;13(12):17138–59. doi: 10.3390/ijms131217138 (PMC3546743; doi:10.3390/ijms131217138)
Supplement: Supplementary file 1 [file ijms-13-17138-s001.pdf]

## Supplementary Information

**Figure S1.** Mass spectrum in positive mode of the reaction product obtained from the cleavage of metergoline into lysergamine.

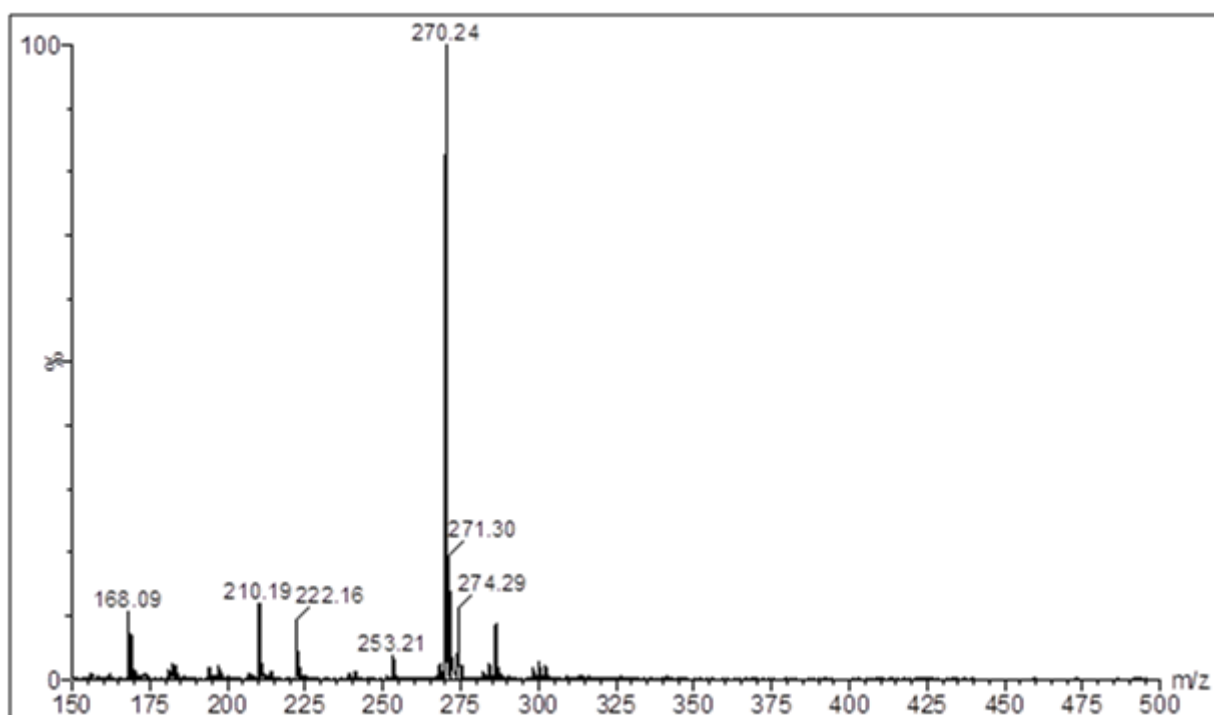

**Figure S2.** Scheme of the reaction between lysergamine and NHS-PEG4-biotin linker.

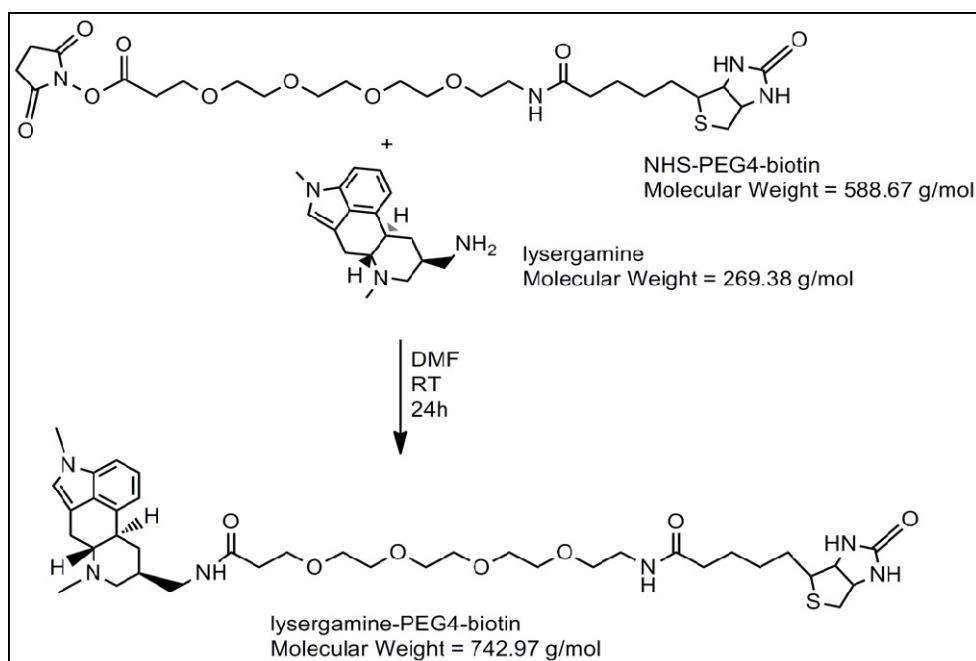

**Figure S3.** Scheme of the reaction between ethanolamine and NHS-PEG4-biotin linker.

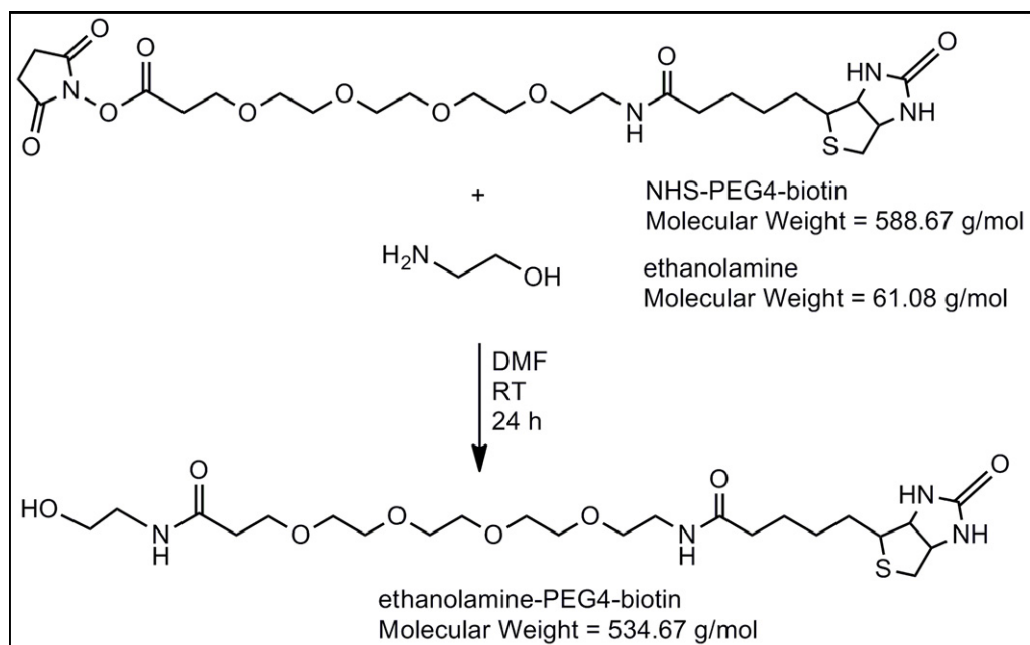

**Figure S4.** Mass spectrum in positive mode of the product obtained from the reaction between lysergamine and NHS-PEG4-biotin linker.

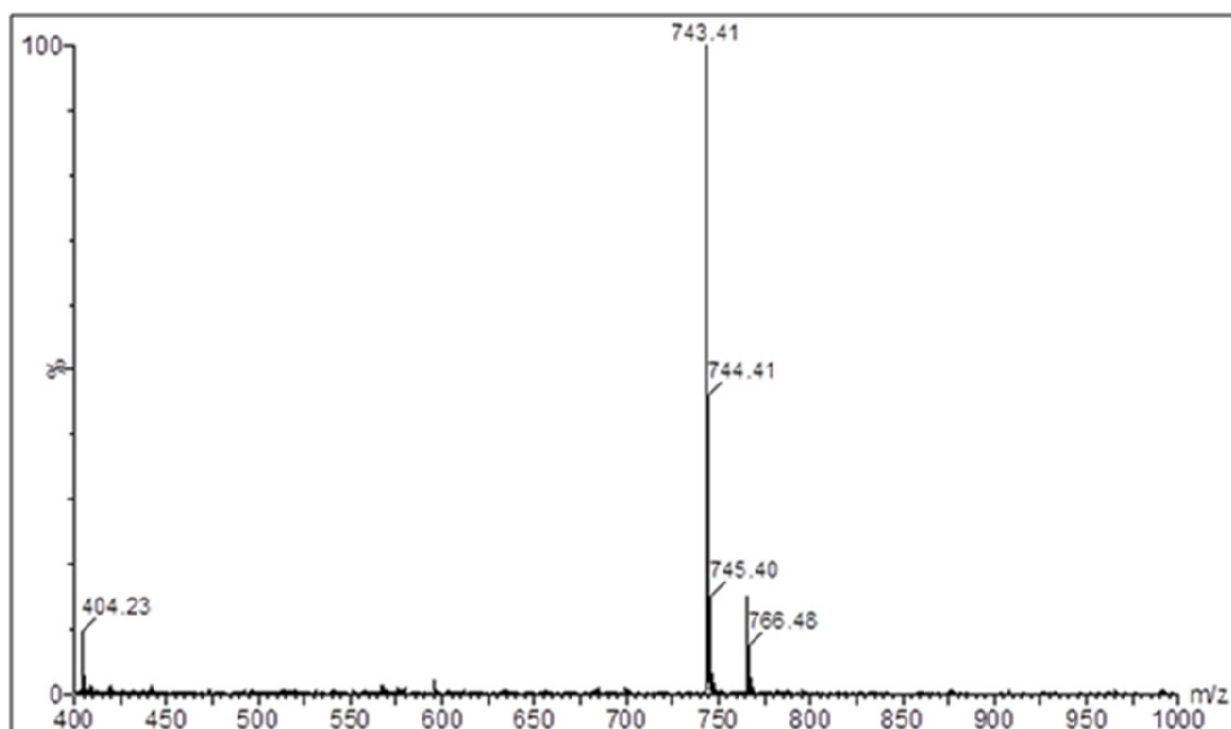

**Figure S5.** Mass spectrum in positive mode of the product obtained from the reaction between ethanolamine and NHS-PEG4-biotin linker.

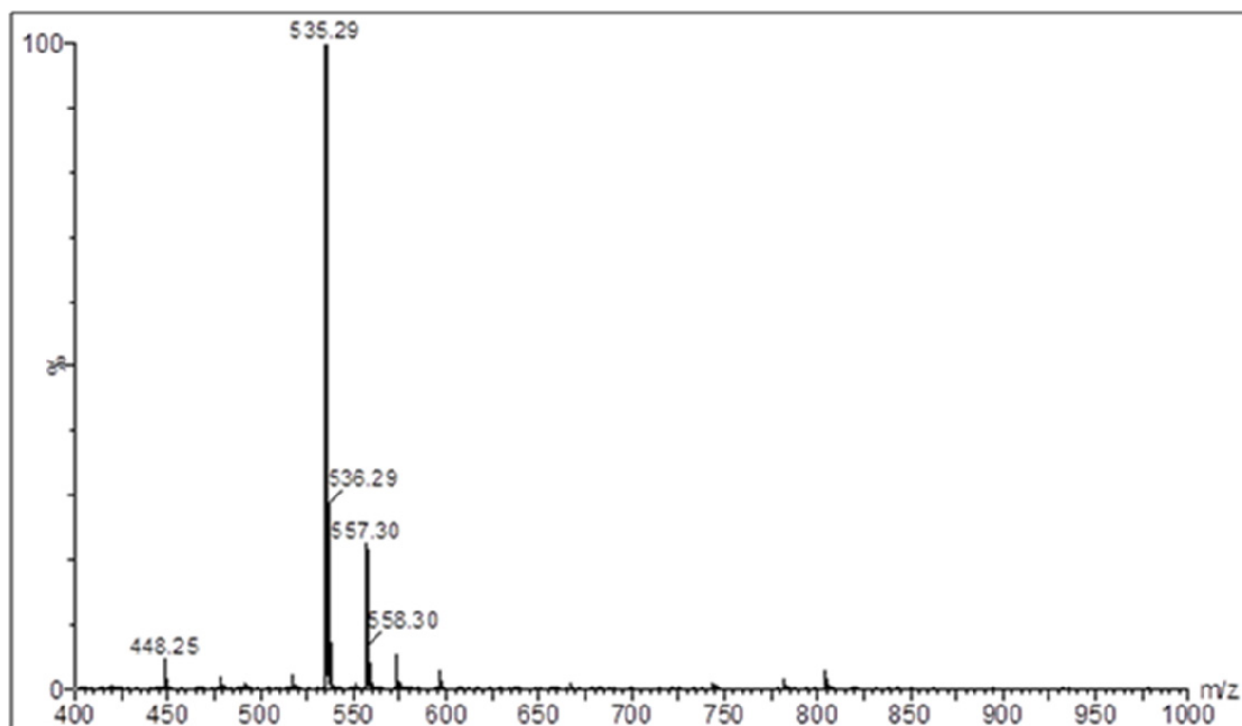

© 2012 by the authors; licensee MDPI, Basel, Switzerland. This article is an open access article distributed under the terms and conditions of the Creative Commons Attribution license (<http://creativecommons.org/licenses/by/3.0/>).
